# Supplementary material
Source: PubMed Central journal article supplement (PMC3478682)
Supplement: NIHMS408418-supplement-1_si_001.pdf [file NIHMS408418-supplement-1_si_001.pdf]

## **Supporting information**

### **Adapting Enzyme-Free DNA Circuits to the Detection of Loop-Mediated Isothermal Amplification Reactions**

Bingling Li, Xi Chen, Andrew D. Ellington\*

Institute for Cellular and Molecular Biology, Center for Systems and Synthetic Biology, Department of Chemistry and Biochemistry, University of Texas at Austin, Austin, TX 78712, USA.

#### **Content:**

- Figure S1
- Figure S2
- Figure S3
- Figure S4
- Table S1
- A note on differential loop concentrations

## 1. Supporting Figures and Tables

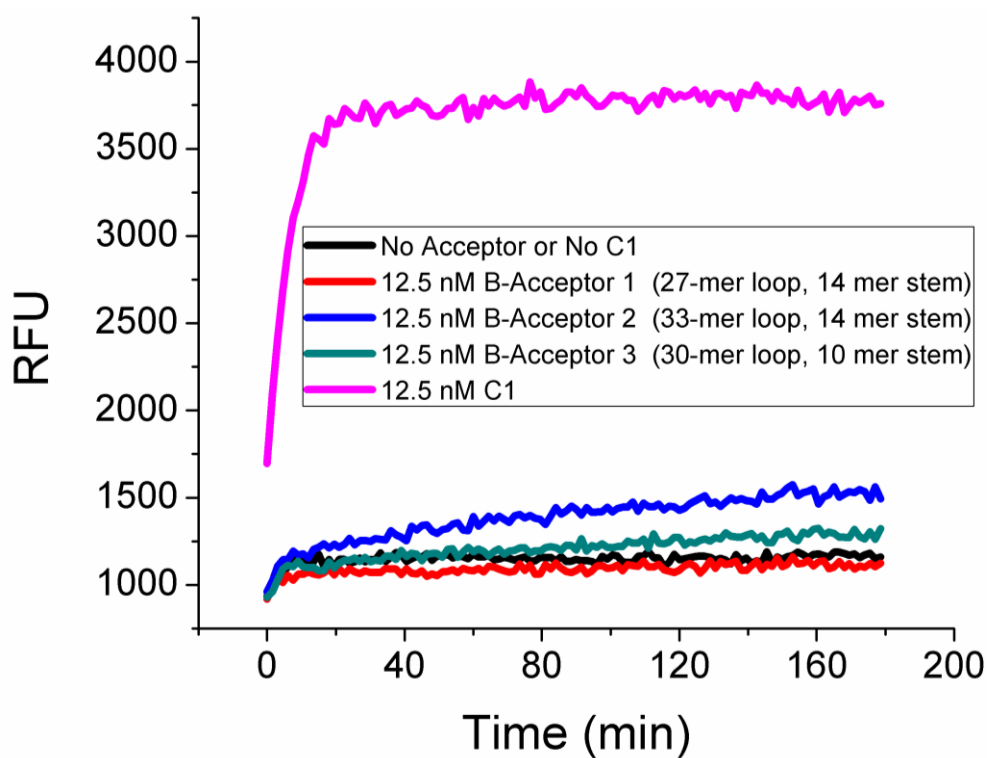

**Figure S1:** CHA catalyzed by **C1** (3-2-1) or by **B-acceptors** that probe **B-target**. The final concentrations of reaction components were as follows:  $[C1] = [B\text{-acceptors}] = 12.5 \text{ nM}$ ,  $[H1] = 50 \text{ nM}$ ,  $[H2] = 400 \text{ nM}$ ,  $[F] = 50 \text{ nM}$ ,  $[Q] = 100 \text{ nM}$ .

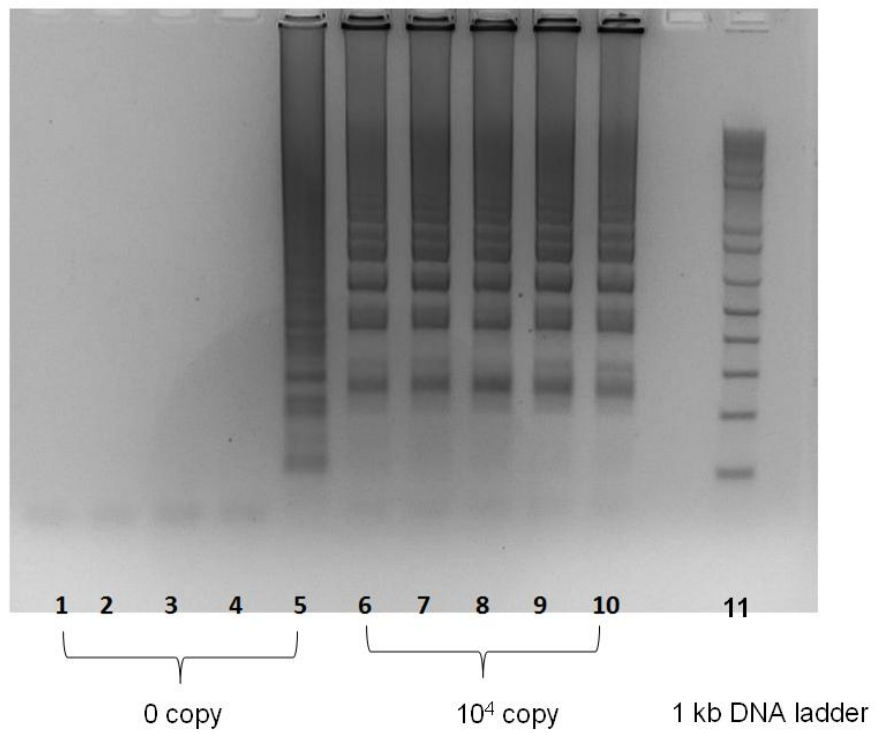

**Figure S2:** LAMP side reactions. Lane **1** to **5**: five parallel reactions carried out without any M13mp18 templates. Lane **6** to **10**: five parallel reactions seeded with  $10^4$  copies of M13mp18. Lane **11**: 1 kb Plus DNA ladder (Invitrogen). Lane **5** is indicative of the large DNA products that can sometimes arise even in primer-only reactions.

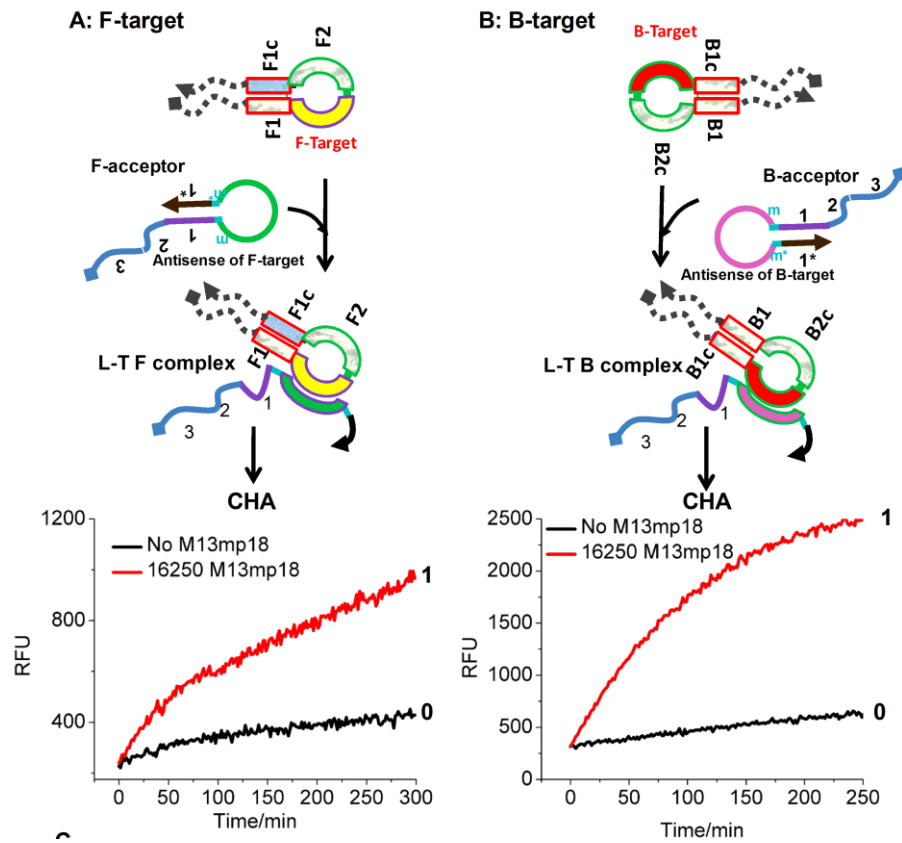

**Figure S3.** Coupling LAMP to a parallel CHA detector. (A) Timecourse of CHA-mediated detection of LAMP via the **F-acceptor1**. (B) Time-course of CHA-mediated detection of LAMP via the **B-acceptor1**.  $[B\text{-acceptor}1]=[F\text{-acceptor}1]=12.5$  nM,  $[H1]=[H3]=50$  nM,  $[H2]=[H4]=400$  nM,  $[F]=[F2]=1/2[Q]=1/2[Q2]=50$  nM.

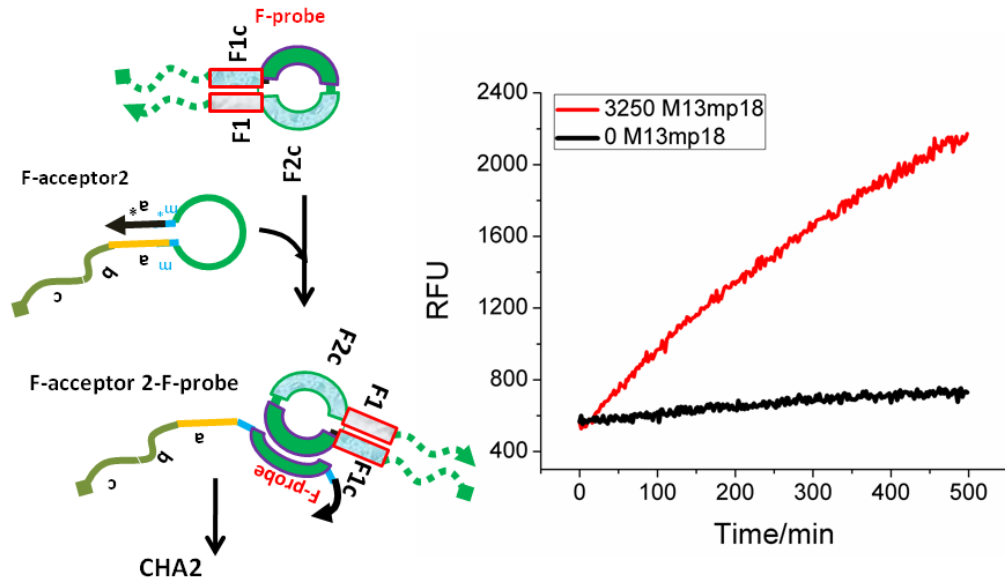

**Figure S4.** Probing LAMP amplicons by using **F-acceptor2** to monitor the **F-probe**, followed by the CHA2 detector. [F-acceptor2]=12.5 nM, [H3]=50 nM, [H4]=400 nM, [F2]=1/2[Q2]=50 nM.

**Table S1:** Oligonucleotides used in this work.

| Name                                                                                | Sequence (5'-3')                             | Modification                                                                            |                                                                                                                                          |
|-------------------------------------------------------------------------------------|----------------------------------------------|-----------------------------------------------------------------------------------------|------------------------------------------------------------------------------------------------------------------------------------------|
| <b>M13mp18</b><br>primer set                                                        | <b>B3</b>                                    | GTTGGGAAGGGCGATCG                                                                       |                                                                                                                                          |
|                                                                                     | <b>B1c-B2</b>                                | ACAACGTCGTGACTGGGAAAACCTTTTTGTGCGGGCCTCTTC<br>GCTATTAC                                  |                                                                                                                                          |
|                                                                                     | <b>F3</b>                                    | ACTTTATGCTTCCGGCTCGTA                                                                   |                                                                                                                                          |
|                                                                                     | <b>F1c-F2</b>                                | CGACTCTAGAGGATCCCCGGTACTTTTTGTGTGTGGAATTG<br>TGAGCGGAT                                  |                                                                                                                                          |
| <b>B-acceptors</b><br>with loop<br>sequences<br>complementary<br>to <b>B-target</b> | <b>B-acceptor 1</b>                          | CGACATCTAACCTAGCTCACTGACTTAAATGTGCTGCAAGGCC<br><u>ATTAAGTTGGGT</u> TTAAGTCAGTGAGC       | Note:<br>The underlined<br>sequence is the<br>loop sequence,<br>and the italicized<br>sequence is the<br>toehold for the<br>CHA catalyst |
|                                                                                     | <b>B-acceptor 2</b>                          | CGACATCTAACCTAGCTCACTGACTTAAACGTTACCCAACT<br><u>TAATCGCCTTGCAGCACATCCTTAAGTCAGTGAGC</u> |                                                                                                                                          |
|                                                                                     | <b>B-acceptor 3</b>                          | CGACATCTAACCTAGCTCACTGACTTAAATGTGCTGCAAGGCC<br><u>ATTAAGTTGGGTA</u> ACTTAAGTCAGGAGC     |                                                                                                                                          |
| <b>F-acceptor</b><br>with loop<br>sequences<br>complementary<br>to <b>F-target</b>  | <b>F-acceptor 1</b>                          | CGACATCTAACCTAGCTCACTGACCGATATTCGTAATCATGGT<br><u>CATAGCTGTTATCG</u> GTCAGTGAGC         |                                                                                                                                          |
| <b>F-acceptor</b><br>with loop<br>sequences<br>complementary<br>to <b>F-probe</b>   | <b>F-acceptor 2</b>                          | GAAATGGCCGAAGATGCTCTAAAGTGCAAACAGCTATGACCAT<br><u>GATTACGAATGC</u> ACTTTAGA             |                                                                                                                                          |
| <b>CHA1</b><br>reaction set                                                         | <b>H1</b>                                    | GTCAGTGAGCTAGGTTAGATGTCGCCATGTGTAGACGACATC<br>TAACCTAGCCCTTGTCATAGAGCAC                 |                                                                                                                                          |
|                                                                                     | <b>H2</b>                                    | AGATGTCGTCTACACATGGCGACATCTAACCTAGCCCATGTGT<br>AGA                                      |                                                                                                                                          |
|                                                                                     | <b>F in reporter1</b>                        | CGAGTGCTCTATGACAAGGGCTAGGTT                                                             | 5' FAM                                                                                                                                   |
|                                                                                     | <b>Q in reporter1</b>                        | CCCTTGTCATAGAGCACTCG                                                                    | 3' IowaBlack FQ                                                                                                                          |
|                                                                                     | <b>C1 =3-2-1</b>                             | CGACATCTAACCTAGCTCACTGAC                                                                |                                                                                                                                          |
| <b>CHA2</b><br>reaction set                                                         | <b>H3</b>                                    | GCACTTTAGAGCATCTTCGGCCATTCGCTATATCCTCCACGG<br>AAATGGCCGAAGATGCTCCTGATGTGGGCTAAAG        |                                                                                                                                          |
|                                                                                     | <b>H4</b>                                    | GCCATTTCCGTGGAGGATATAGCGAAATGGCCGAAGATGCTC<br>GCTATATCCTCCACG                           |                                                                                                                                          |
|                                                                                     | <b>F2 in reporter2</b>                       | GCTAGGCTTTAGCCACATCAGGAGCATCTTCG                                                        | 5' FAM                                                                                                                                   |
|                                                                                     | <b>Q2 in reporter2</b>                       | CCTGATGTGGGCTAAAGCCTAGC                                                                 | 3' IowaBlack FQ                                                                                                                          |
|                                                                                     | <b>C2=c-b-a</b>                              | GAAATGGCCGAAGATGCTCTAAAGTGC                                                             |                                                                                                                                          |
| <b>AND gate</b><br>reporter set                                                     | <b>F3</b>                                    | CGAGTGCTCTATGACAAGGGCTAGGTTTTCAGCCACATCAG<br>GAGCATCTTCG                                | 5' FAM                                                                                                                                   |
|                                                                                     | <b>Q in reporter1</b>                        | CCCTTGTCATAGAGCACTCG                                                                    | 3' IowaBlack FQ                                                                                                                          |
|                                                                                     | <b>M</b>                                     | CCTGATGTGGGCTAAAGACCTAGC                                                                |                                                                                                                                          |
| <b>MB</b> used in control experiment to<br>molecular beacon                         | CACTGAC ATGTGCTGCAAGGGCGATTAAGTTGGGT GTCAGTG | 3' IowaBlack FQ<br>5'FAM                                                                |                                                                                                                                          |

## 2. A note on differential loop concentrations

There are 4 loops that transiently form during the production of LAMP products: **F-target**, **B-probe**, **B-target**, and **F-probe** (as shown in **Figure 1**). However, the average lifetimes of these loops are different. Loops **F-target** and **B-probe** are created during a strand displacement reaction. The completion of this displacement reaction results in a hairpin loop that can be extended by the polymerase. This extension will turn loops **F-target** and **B-probe** into duplexes. Since unimolecular folding and primer extension are relatively fast reactions, loops **F-target** and **B-probe** are quickly extinguished.

In contrast, loops **B-target** and **F-probe** are inactivated by a bimolecular primer-binding event followed by primer extension. At standard primer concentrations, the relative rate of primer-binding should be lower than for unimolecular folding, and the lifetimes of these loops are correspondingly longer than those of **F-target** and **B-probe**.
